# Supplementary material for: Reliability, Validity, and Factor Structure of the Internalized AIDS-Related Stigma Scale in Southern India
Source: PubMed Central journal article supplement (PMC6748476; doi:10.1177/2325958219831025), 2019-02-20
Supplement: IARSSIndia-JIAPAC_revised_Supplemental_material.pdf [file IARSSIndia-JIAPAC_revised_Supplemental_material.pdf]

1

## Supplementary Digital Content

2

### Internalized AIDS-Related Stigma Scale with two factors, men only

| Item                                                  | No. (%) or mean (SD) | Factor loading | Item-test correlation | Cronbach's alpha if deleted |
|-------------------------------------------------------|----------------------|----------------|-----------------------|-----------------------------|
| Factor 1: Self-hatred                                 |                      |                |                       |                             |
| Being HIV positive makes me feel dirty                | 109 (28.1%)          | 0.65           | 0.77                  | 0.80                        |
| I feel guilty that I am HIV positive                  | 95 (24.5%)           | 0.83           | 0.85                  | 0.70                        |
| I am ashamed that I am HIV positive                   | 47 (12.1%)           | 0.84           | 0.78                  | 0.75                        |
| I sometimes feel worthless because I am HIV positive  | 62 (16.0%)           | 0.81           | 0.79                  | 0.75                        |
| <i>Endorsed at least one self-hatred item</i>         | 85 (31.7%)           |                |                       |                             |
| <i>Mean self-hatred score (0-4)</i>                   | 0.8 (1.3)            |                |                       |                             |
| Factor 2: Fears of disclosure                         |                      |                |                       |                             |
| It is difficult to tell people about my HIV infection | 315 (81.2%)          | 0.95           | n/a                   | n/a                         |
| I hide my HIV status from others                      | 310 (79.9%)          | 0.96           | n/a                   | n/a                         |
| <i>Endorsed at least one fears of disclosure item</i> | 321 (82.7%)          |                |                       |                             |
| <i>Mean fears of disclosure score (0-2)</i>           | 1.6 (0.8)            |                |                       |                             |

3

4

### Internalized AIDS-Related Stigma Scale with two factors, women only

| Item                                                 | No. (%) or mean (SD) | Factor loading | Item-test correlation | Cronbach's alpha if deleted |
|------------------------------------------------------|----------------------|----------------|-----------------------|-----------------------------|
| Factor 1: Self-hatred                                |                      |                |                       |                             |
| Being HIV positive makes me feel dirty               | 65 (24.3%)           | 0.56           | 0.75                  | 0.79                        |
| I feel guilty that I am HIV positive                 | 60 (22.4%)           | 0.80           | 0.87                  | 0.65                        |
| I am ashamed that I am HIV positive                  | 24 (9.0%)            | 0.83           | 0.74                  | 0.73                        |
| I sometimes feel worthless because I am HIV positive | 30 (11.2%)           | 0.85           | 0.77                  | 0.71                        |
| <i>Endorsed at least one self-hatred item</i>        | 225 (34.1%)          |                |                       |                             |
| <i>Mean self-hatred score (0-4)</i>                  | 0.7 (1.1)            |                |                       |                             |

| Factor 2: Fears of disclosure                         |             |      |     |     |
|-------------------------------------------------------|-------------|------|-----|-----|
| It is difficult to tell people about my HIV infection | 215 (80.2%) | 0.95 | n/a | n/a |
| I hide my HIV status from others                      | 204 (76.1%) | 0.95 | n/a | n/a |
| <i>Endorsed at least one fears of disclosure item</i> | 216 (80.6%) |      |     |     |
| <i>Mean fears of disclosure score (0-2)</i>           | 1.6 (0.8)   |      |     |     |

1

2
